# Supplementary material for: Protective Effect of Flavonoids against Methylglyoxal-Induced Oxidative Stress in PC-12 Neuroblastoma Cells and Its Structure–Activity Relationships
Source: MDPI journal article supplement (doi:10.3390/molecules27227804), 2022-11-12
Supplement: s1 [file s1]

## Supplementary Materials

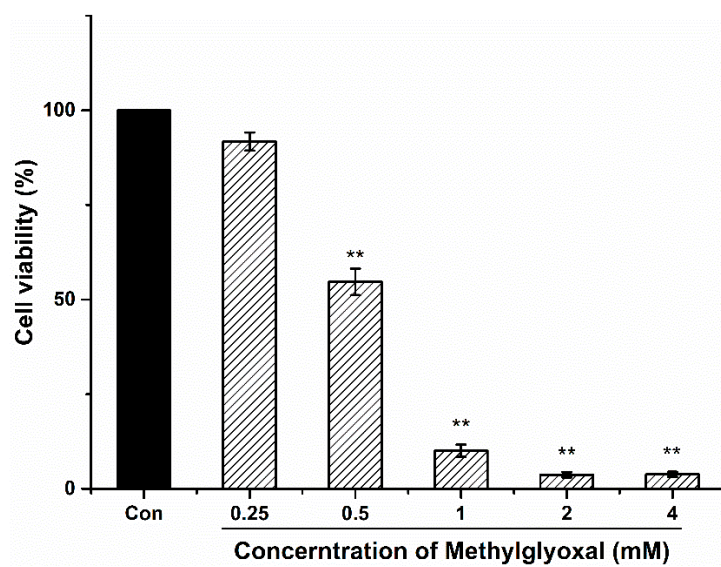

Figure S1. Cell viability of PC-12 cells treated by MG. \*  $p < 0.05$ , \*\*  $p < 0.01$  compared with the control.

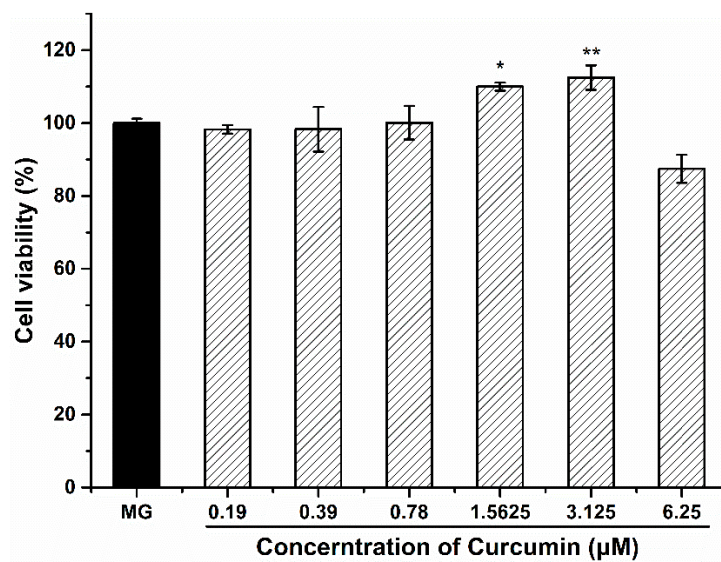

Figure S2. Cell viability of MG-induced PC-12 cells treated by curcumin. \*  $p < 0.05$ , \*\*  $p < 0.01$  compared with the MG group.

# **Isoflavone**

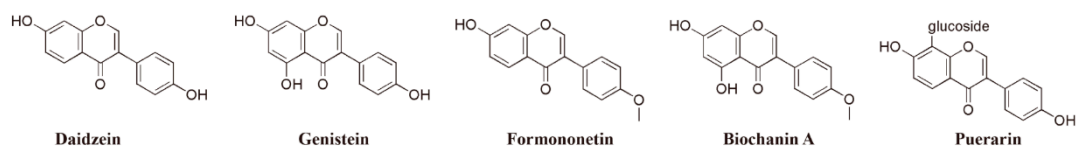

# **Flavone**

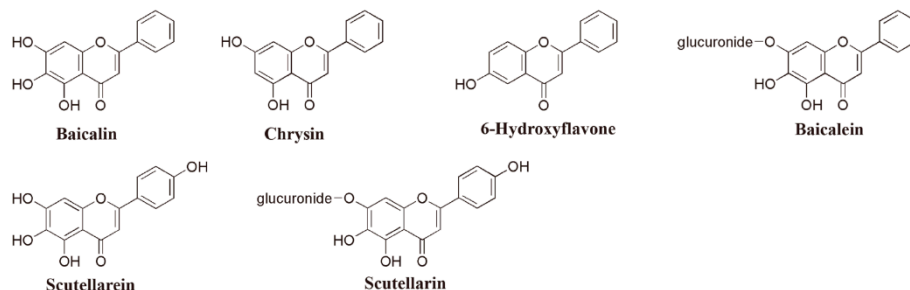

**Figure S3.** Other flavonoids tested in protective activities on MG-induced PC12 cells.

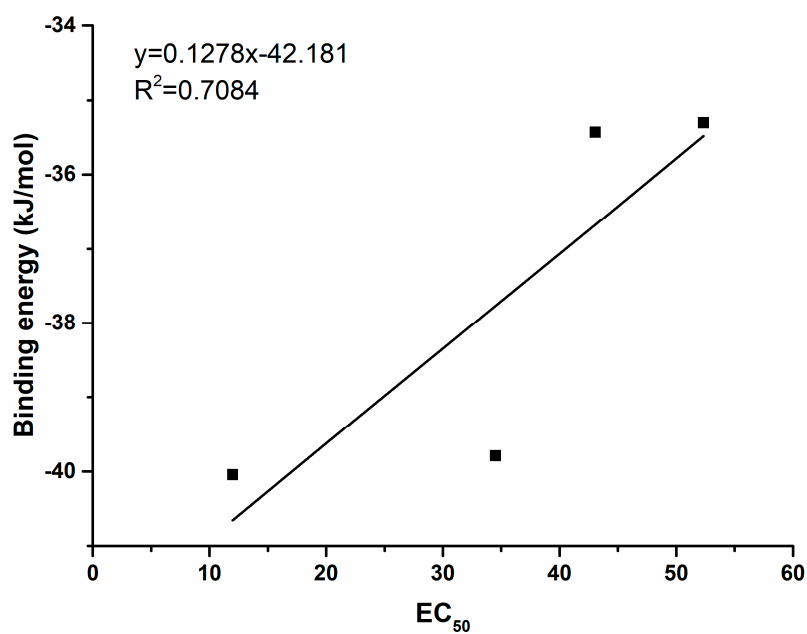

**Figure S4.** The linear correlation between binding energy of main flavan 3-ols (EC, EGC, ECG, EGCG) and the EC<sub>50</sub> for MG-induced PC-12 cells.
